# Supplementary material for: Combination Therapy versus Monotherapy in the Treatment of Stenotrophomonas maltophilia Infections: A Systematic Review and Meta-Analysis
Source: MDPI journal article supplement (doi:10.3390/antibiotics11121788), 2022-12-09
Supplement: s1 [file s1]

## Supplementary materials

### Table

**Table S1.** Search algorithms.

**Table S2.** Quality assessments of case reports and case series

**Table S3.** Description of characteristics of included studies of combination treatment of *S. maltophilia* infection.

**Table S4.** Description of characteristics of cohort studies included in the systematic review and meta-analysis.

### Figure

**Figure S1.** Summarized risk of bias of included studies using ROBINS-I tool

**Figure S2.** The funnel plot of included studies in the meta-analysis

**Figure S3.** The graph from Egger's test of included studies in the meta-analysis

**TableS1.** Search algorithms.

| Database            | No | Step search algorithm                                                                           | Items found  |
|---------------------|----|-------------------------------------------------------------------------------------------------|--------------|
| PubMed<br>Central   | #1 | Search <i>Stenotrophomonas</i>                                                                  | 13986        |
|                     | #2 | Search Mortality                                                                                | 1,708,126    |
|                     | #3 | Search Therapeutics                                                                             | 1,115,408    |
|                     | #4 | Search Anti-bacterial agents                                                                    | 283,485      |
|                     | #5 | Search Therapeutics OR Anti-bacterial agents                                                    | 1,318,731    |
|                     | #6 | <b>Search <i>Stenotrophomonas</i> AND Mortality AND (Therapeutics OR Anti-bacterial agents)</b> | <b>2,992</b> |
| Cochrane<br>Library | #1 | Search <i>Stenotrophomonas</i>                                                                  | 71           |
|                     | #2 | Search Mortality                                                                                | 106,143      |
|                     | #3 | Search Therapeutics                                                                             | 387,835      |
|                     | #4 | Search Anti-bacterial agents                                                                    | 11,917       |
|                     | #5 | Search Therapeutics OR Anti-bacterial agents                                                    | 338,259      |
|                     | #6 | <b>Search <i>Stenotrophomonas</i> AND Mortality AND (Therapeutics OR Anti-bacterial agents)</b> | <b>17</b>    |
| EMBASE              | #1 | Search <i>Stenotrophomonas</i>                                                                  | 9,317        |
|                     | #2 | Search Mortality                                                                                | 1,787,666    |
|                     | #3 | Search Therapeutics                                                                             | 477,741      |
|                     | #4 | Search Anti-bacterial agents                                                                    | 22,095       |
|                     | #5 | Search Therapeutics OR Anti-bacterial agents                                                    | 344,732      |
|                     | #6 | <b>Search <i>Stenotrophomonas</i> AND Mortality AND (Therapeutics OR Anti-bacterial agents)</b> | <b>1,741</b> |
| SCOPUS              | #1 | Search <i>Stenotrophomonas</i>                                                                  | 7,164        |
|                     | #2 | Search Mortality                                                                                | 1,663,755    |
|                     | #3 | Search Therapeutics                                                                             | 140,085      |
|                     | #4 | Search Anti-bacterial agents                                                                    | 278,743      |
|                     | #5 | Search Therapeutics OR Anti-bacterial agents                                                    | 324,735      |
|                     | #6 | <b>Search <i>Stenotrophomonas</i> AND Mortality AND (Therapeutics OR Anti-bacterial agents)</b> | <b>278</b>   |
| Clinicaltrial.gov   | #1 | Search <i>Stenotrophomonas</i>                                                                  | 3            |
|                     | #2 | Search Mortality                                                                                | 1,925        |
|                     | #3 | Search Therapeutics                                                                             | 102207       |
|                     | #4 | Search Anti-bacterial agents                                                                    | 2,751        |
|                     | #5 | Search Therapeutics OR Anti-bacterial agents                                                    | 103,907      |
|                     | #6 | <b>Search <i>Stenotrophomonas</i> AND Mortality AND (Therapeutics OR Anti-bacterial agents)</b> | <b>2</b>     |
| Open Grey           | #1 | Search <i>Stenotrophomonas</i>                                                                  | 4            |
|                     | #2 | Search Mortality                                                                                | 1,395        |
|                     | #3 | Search Therapeutics                                                                             | 38           |
|                     | #4 | Search Anti-bacterial agents                                                                    | 0            |
|                     | #5 | Search Therapeutics OR Anti-bacterial agents                                                    | 471          |
|                     | #6 | <b>Search <i>Stenotrophomonas</i> AND Mortality AND (Therapeutics OR Anti-bacterial agents)</b> | <b>0</b>     |

**Table S2.** Quality assessments of case reports and case series

| Author, year          | Item 1 <sup>a</sup> | Item 2 <sup>b</sup> | Item 3 <sup>c</sup> | Item 4 <sup>d</sup> | Item 5 <sup>e</sup> | Item 6 <sup>f</sup> | Item 7 <sup>g</sup> | Item 8 <sup>h</sup> |
|-----------------------|---------------------|---------------------|---------------------|---------------------|---------------------|---------------------|---------------------|---------------------|
| Munter (1998) [15]    | Y                   | Y                   | Y                   | Y                   | N                   | N                   | Y                   | Y                   |
| Kim (2001) [16]       | Y                   | Y                   | Y                   | N                   | N                   | N                   | Y                   | Y                   |
| Wood (2010) [17]      | Y                   | Y                   | Y                   | N                   | N                   | N                   | Y                   | Y                   |
| Holifield (2011) [18] | Y                   | Y                   | Y                   | N                   | N                   | N                   | Y                   | Y                   |
| Mori (2014) [19]      | Y                   | Y                   | Y                   | Y                   | N                   | N                   | Y                   | Y                   |
| Reynaud (2015) [20]   | Y                   | Y                   | Y                   | Y                   | N                   | N                   | Y                   | Y                   |
| Mojica (2016) [21]    | Y                   | Y                   | Y                   | N                   | N                   | N                   | Y                   | Y                   |
| Subhani (2016) [12]   | Y                   | Y                   | Y                   | N                   | N                   | N                   | Y                   | Y                   |
| Kaito (2018) [22]     | Y                   | Y                   | Y                   | Y                   | N                   | N                   | Y                   | Y                   |
| Payen (2019) [11]     | Y                   | Y                   | Y                   | Y                   | N                   | N                   | Y                   | Y                   |
| Andrei (2020) [23]    | Y                   | Y                   | Y                   | N                   | N                   | N                   | Y                   | Y                   |
| Khanum (2020) [10]    | Y                   | Y                   | Y                   | N                   | N                   | N                   | Y                   | Y                   |

<sup>a</sup>Does the patient(s) represent the whole experience of the investigator (center)?

<sup>b</sup>Was the exposure adequately ascertained?

<sup>c</sup>Was the outcome adequately ascertained?

<sup>d</sup>Were other alternative causes that may explain the observation ruled out?

<sup>e</sup>Was there a challenge/rechallenge phenomenon?

<sup>f</sup>Was there a dose-response effect?

<sup>g</sup>Was follow-up long enough for outcome to occur?

<sup>h</sup>Is the case(s) described with sufficient details to allow other investigators to replicate the research or to allow practitioner make inference related to their own practice?

|                     | 1. Bias due to judgment confounding | 2. Bias in selection of participants | 3. Bias in measurement of interventions | 4. Bias due to deviations from intended interventions | 5. Bias due to missing data | 6. Bias in measurement of outcomes | 7. Bias in selection of reported results | Overall  |
|---------------------|-------------------------------------|--------------------------------------|-----------------------------------------|-------------------------------------------------------|-----------------------------|------------------------------------|------------------------------------------|----------|
| Shah et al (2019)   | Low                                 | Moderate                             | Low                                     | Moderate                                              | Low                         | Low                                | Low                                      | Moderate |
| Guerce et al (2019) | Moderate                            | Moderate                             | Low                                     | Low                                                   | Moderate                    | Low                                | Moderate                                 | Serious  |
| Araoka et al (2017) | Moderate                            | Low                                  | Moderate                                | Low                                                   | Low                         | Low                                | Low                                      | Moderate |
| Muder et al (1996)  | Serious                             | Low                                  | Moderate                                | Low                                                   | Low                         | Low                                | Moderate                                 | Serious  |

**Figure S1** Summarized risk of bias of included studies using ROBINS-I tool

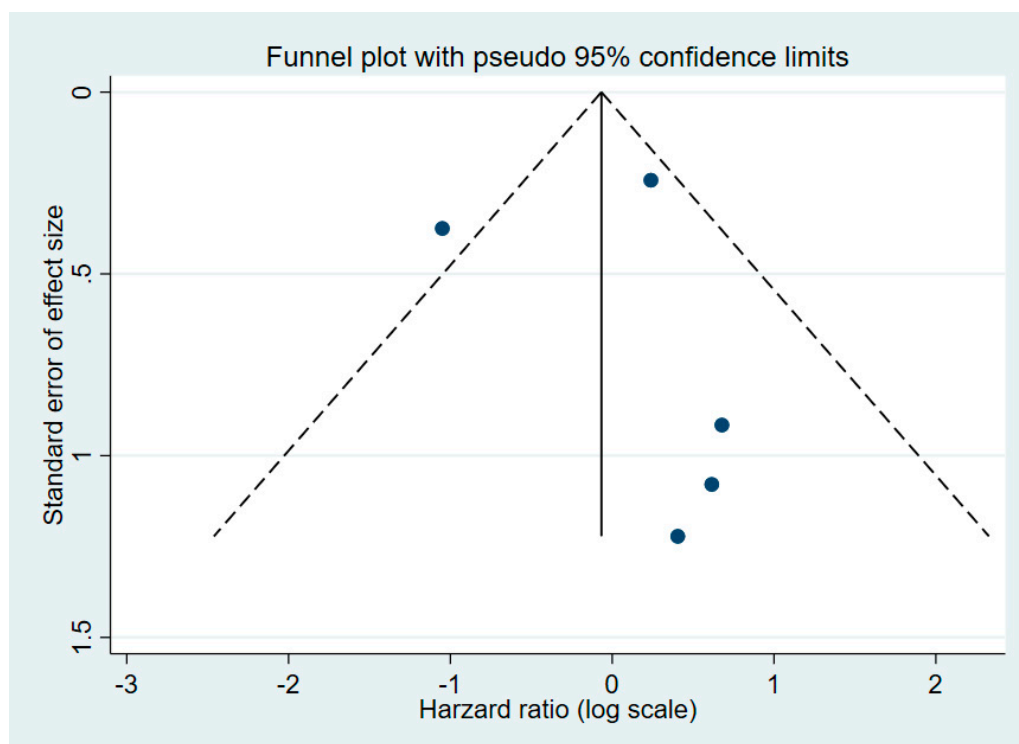

**Figure S2.** The funnel plot of included studies in the meta-analysis

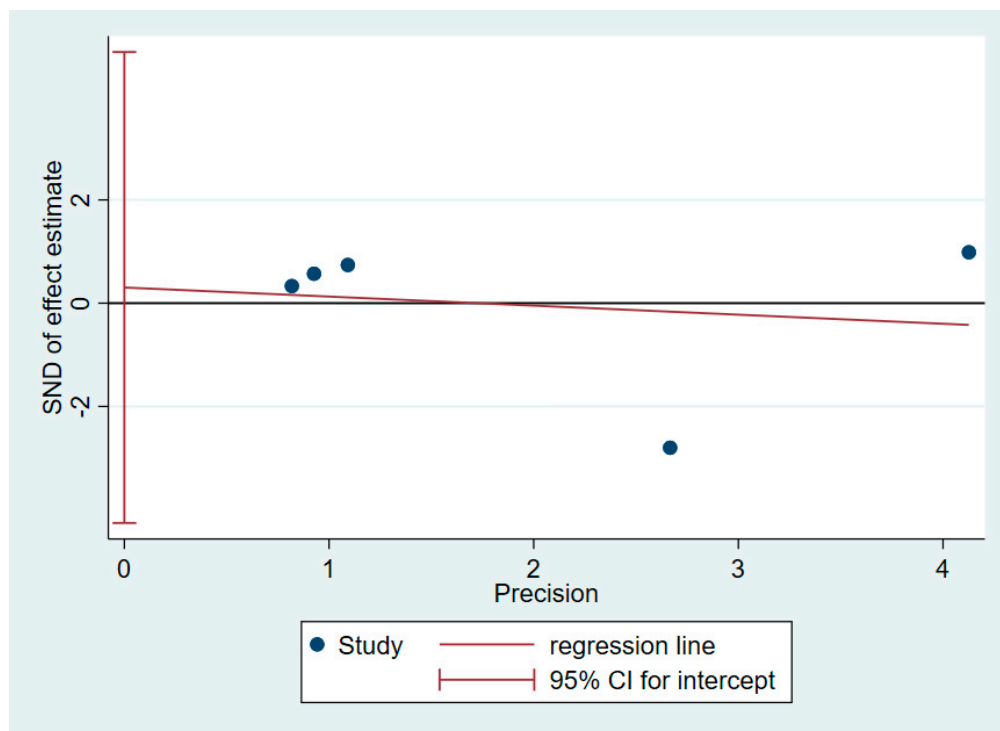

**Figure S3.** The graph from Egger's test of included studies in the meta-analysis

**Table S3.** Description of characteristics of included studies of combination treatment of *S. maltophilia* infection.

| Author/<br>Year   | Region | Design         | Sample<br>size | Sex                | Age<br>(years) | Infection                 | Antimicrobial<br>susceptibility                                                  | Details of antimicrobials                                                                                                                                                                                           |                                                                                                                  | Treatment<br>duration<br>(days) | Follow up<br>time (days)<br>(n) | Outcome                                              |
|-------------------|--------|----------------|----------------|--------------------|----------------|---------------------------|----------------------------------------------------------------------------------|---------------------------------------------------------------------------------------------------------------------------------------------------------------------------------------------------------------------|------------------------------------------------------------------------------------------------------------------|---------------------------------|---------------------------------|------------------------------------------------------|
|                   |        |                |                |                    |                |                           |                                                                                  | Combined antimicrobials                                                                                                                                                                                             | Dosage regimens                                                                                                  |                                 |                                 |                                                      |
| Robert,<br>1996   | USA    | Cohort         | 18             | N/A                | 23-85          | Bacteremia                | TMP-SMX: S<br>(91%)                                                              | 2 or more of these agents<br>-TMP-SMX<br>-third-generation<br>cephalosporin<br>-extended-spectrum<br>penicillin                                                                                                     | N/A                                                                                                              | N/A                             | N/A                             | died 18%                                             |
| Munter,<br>1998   | Israel | Case<br>report | 1              | F                  | 69             | Infective<br>endocarditis | TMP-SMX: S<br>Ciprofloxacin: S                                                   | TMP-SMX+ CIP                                                                                                                                                                                                        | N/A                                                                                                              | 40                              | N/A                             | Died                                                 |
| Jae-Han,<br>2001  | Korea  | Case<br>report | 1              | M                  | 44             | Infective<br>endocarditis | TMP-SMX: S<br>Tobramycin: S<br>Gentamicin: S<br>Ofloxacin: S<br>Ciprofloxacin: I | TMP-SMX+ Tobramycin                                                                                                                                                                                                 | -TMP-SMX: 400 mg/80 mg IV q 8<br>hr<br>-Tobramycin: 1.7 mg/kg IV q 8 hr                                          | 42                              | 60                              | Clinical response                                    |
| Wood,<br>2010     | USA    | Case<br>report | 1              | M                  | 28             | VAP                       | TMX-SMX: S<br>Doxycycline: S<br>Minocycline: S<br>Colistin: S                    | TMX-SMX then change<br>doxycycline+<br>Aerosolized COL                                                                                                                                                              | -TMP-SMX : TMP 4 mg/kg IV q 6<br>hr<br>-Doxycycline: 100 mg IV q 12 hr<br>-Aerosolized COL: 150 mg NB q<br>12 hr | 14                              | 33                              | - Clinical response<br>- Microbiological<br>response |
| Karintha,<br>2011 | USA    | Case<br>report | 1              | M                  | 41             | Keratitis                 | N/A                                                                              | Gatifloxacin ED +<br>polymyxin/trimethoprim ED                                                                                                                                                                      | -Gatifloxacin 0.3% ED: q 2 hr to<br>left eye<br>-polymyxin/trimethoprim 0.1% ED:<br>q 2 hr to left eye           | 10                              | N/A                             | - Clinical response<br>- Microbiological<br>response |
| Mori,<br>2014     | Japan  | Case<br>series | 8              | F (3),<br>M (5)    | 42-62          | Hemorrhagic<br>pneumonia  | TMP-SMX: S (80-<br>90%)<br>fluoroquinolone: S<br>(50-70%)                        | TMP-SMX+<br>fluoroquinolone                                                                                                                                                                                         | -TMP-SMX: high dose<br>-Fluoroquinolone: N/A                                                                     | 1-16                            | N/A                             | died 100%                                            |
| Reynaud,<br>2015  | France | Case<br>report | 1              | F                  | 81             | Infective<br>endocarditis | N/A                                                                              | TMP-SMX+<br>Moxifloxacin                                                                                                                                                                                            | N/A                                                                                                              | 2                               | N/A                             | Died                                                 |
| Maria, 2016       | USA    | Case<br>report | 1              | M                  | 19             | Bacteremia                | Minocycline: I                                                                   | CAZ/avibactam+<br>Aztreonam                                                                                                                                                                                         | -CAZ/avibactam: 2.5 g IV q 8 hr<br>-Aztreonam: 2 g IV q 8 hr                                                     | 48                              | N/A                             | - Microbiological<br>response                        |
| Subhani,<br>2016  | India  | Case<br>series | 28             | M<br>(20)<br>F (8) | 22-78          | Infective<br>endocarditis | N/A                                                                              | CHL+KAN+COL<br>CAR+GEN+KAN,<br>CHL+PEN+POL<br>CAR+GEN+ TMP-SMX<br>STR+PEN<br>CAR+AMK+ TMP-SMX<br>CAR+KAN+ TMP-SMX<br>POL+ TMP-SMX<br>GEN+CHL<br>TIC+MOX+ TMP-SMX<br>TMP-SMX +AMC+GEN<br>CAZ+GEN+ TMP-SMX<br>CIP+GEN | N/A                                                                                                              | 42 (1), N/A<br>(27)             | N/A (27), 60<br>(1)             | - 67.86% cured<br>- 28.57% died<br>- 3.57% N/A       |

| Author/<br>Year  | Region   | Design         | Sample<br>size | Sex               | Age<br>(years) | Infection                                           | Antimicrobial<br>susceptibility                                                                      | Details of antimicrobials                                                                                                                                                                                                                          |                                                                                                                                                                        | Treatment<br>duration<br>(days) | Follow up<br>time (days)<br>(n) | Outcome                                                                      |
|------------------|----------|----------------|----------------|-------------------|----------------|-----------------------------------------------------|------------------------------------------------------------------------------------------------------|----------------------------------------------------------------------------------------------------------------------------------------------------------------------------------------------------------------------------------------------------|------------------------------------------------------------------------------------------------------------------------------------------------------------------------|---------------------------------|---------------------------------|------------------------------------------------------------------------------|
|                  |          |                |                |                   |                |                                                     |                                                                                                      | Combined antimicrobials                                                                                                                                                                                                                            | Dosage regimens                                                                                                                                                        |                                 |                                 |                                                                              |
|                  |          |                |                |                   |                |                                                     |                                                                                                      | TIM+ TMP-SMX<br>TZP+GEN<br>CAZ+GEN+CIP+ TMP-<br>SMX CAZ+AMK+CIP then<br>TIM+ TMP-SMX +COL<br>CIP+CHL<br>TIM+ TMP-SMX<br>VAN+GEN<br>VAN+GEN<br>LVX+ TMP-SMX<br>FEP+CIP+ TMP-SMX<br>TMP-SMX +GEN<br>TMP-SMX +TIM<br>TMP-SMX +CAZ<br>TMP-SMX +CIP+TZP |                                                                                                                                                                        |                                 |                                 |                                                                              |
| Araoka,<br>2017  | Japan    | Cohort         | 14             | M<br>(85.71<br>%) | 23-72          | Bacteremia                                          | TMP-SMX: S<br>(94%)                                                                                  | N/A                                                                                                                                                                                                                                                | N/A                                                                                                                                                                    | N/A                             | 30                              | died 50%                                                                     |
| Satoshi,<br>2018 | Japan    | Case<br>report | 1              | M                 | 28             | Bacteremia,<br>Pneumonia                            | N/A                                                                                                  | TMP-SMX+CIP                                                                                                                                                                                                                                        | N/A                                                                                                                                                                    | 18                              | N/A                             | Died                                                                         |
| Payen,<br>2019   | France   | Case<br>series | 4              | N/A               | 56-83          | VAP (2),<br>Peritonitis (1)                         | N/A                                                                                                  | CIP+<br>CAZ,tigecycline+colimycin                                                                                                                                                                                                                  | N/A                                                                                                                                                                    | 14                              | 176                             | - 100% had clinical<br>response<br>- 100% had<br>microbiological<br>response |
| Shah, 2019       | USA      | Cohort         | 38             | M<br>(29%)        | 18-89          | Pneumonia                                           | TMP-SMX: S<br>(8%)<br>Fluoroquinolone:S<br>(13%)<br>Minocycline: S<br>(0%)<br>Ceftazidime: S<br>(1%) | TMP-SMX + LVX,<br>TMP-SMX + CIP,<br>TMP-SMX + moxifloxacin,<br>TMP-SMX + minocycline,<br>TMP-SMX + CAZ,<br>LVX + minocycline,<br>LVX + CAZ,<br>CIP + minocycline,<br>CIP + CAZ,<br>minocycline + CAZ                                               | N/A                                                                                                                                                                    | N/A                             | N/A                             | died 39.47%                                                                  |
| Guerri,<br>2019  | France   | Cohort         | 167            | M<br>(69.9<br>%)  | 56-74          | Pneumonia                                           | TMP-SMX: S<br>(88.1%)<br>TIM (73.3%)                                                                 | N/A                                                                                                                                                                                                                                                | N/A                                                                                                                                                                    | 7                               | N/A                             | died 37.72%                                                                  |
| Stefan,<br>2020  | Romania  | Case<br>report | 1              | F                 | 61             | Severe<br>pneumonia with<br>pulmonary<br>hemorrhage | TMP-SMX: S<br>Levofloxacin: I                                                                        | COL + TMP-SMX                                                                                                                                                                                                                                      | N/A                                                                                                                                                                    | 7                               | 300                             | - Clinical response<br>- Microbiological<br>response                         |
| Khanum,<br>2020  | Pakistan | Case<br>series | 2              | F (1),<br>M (1)   | 60, 35         | Meningitis                                          | TMP-SMX: S<br>Colistin: S                                                                            | COL (polymyxin E) +<br>TMP-SMX,<br>TMP-SMX + CAZ                                                                                                                                                                                                   | -polymyxin E: 3 million units q 8 hr<br>along with intrathecal polymyxin E:<br>300,000 IU/day,<br>-TMP-SMX: TMP15m/kg/d in 3<br>divided doses,<br>-CAZ: 2 gm IV q 8 hr | 21                              | N/A                             | - 100% had clinical<br>improvement<br>- 100% had CSF<br>culture negative     |

Abbreviations: ED; eye drop, F; female, I: intermediate, M; male, N/A; not applicable, NB; nebulize, R; resistant, S; susceptible; AMC, ampicillin; AMK, amikacin; CAR, carbenicillin; CAZ, ceftazidime; CHL, chloramphenicol; CIP, ciprofloxacin; COL, colistin; FEP, cefepime; GEN, gentamicin; KAN, kanamycin; LVX, levofloxacin; MOX, moxalactam; PEN, penicillin; POL, polymyxin; STR, streptomycin; TIC, ticarcillin; TIM, ticarcillin/clavulanic acid; TMP-SMX; trimethoprim-sulfamethoxazole; TZP, piperacillin/tazobactam; VAN, vancomycin

**Table S4.** Description of characteristics of cohort studies included in the systematic review and meta-analysis.

| characteristic                 | Included cohort studies                                         |                                                                        |                                                                                                                                                             |                                                                           |
|--------------------------------|-----------------------------------------------------------------|------------------------------------------------------------------------|-------------------------------------------------------------------------------------------------------------------------------------------------------------|---------------------------------------------------------------------------|
|                                | Shah et al (2019)                                               | Guerci et al (2019)                                                    | Araoka et al (2017)                                                                                                                                         | Muder et al (1996)                                                        |
| region                         | USA                                                             | France                                                                 | Japan                                                                                                                                                       | USA                                                                       |
| Study design                   | Cohort study                                                    | Cohort study                                                           | Cohort study                                                                                                                                                | Cohort study                                                              |
| Duration of study (year)       | 6                                                               | 5                                                                      | 2                                                                                                                                                           | 3                                                                         |
| Sample size (n)                | 252                                                             | 282                                                                    | 20                                                                                                                                                          | 91                                                                        |
| Characteristic of participants | Patient age: 18-89 years old with <i>S.maltophiliapneumonia</i> | Patient age $\geq 18$ years old who with <i>S.maltophiliapneumonia</i> | Patient age:23-85 years old with <i>S.maltophiliabacteremia</i> infection                                                                                   | Patient age:23-85 years old with <i>S.maltophiliabacteremia</i> infection |
| Outcome                        | <u>Primary outcome:</u>                                         | <u>Primary outcome:</u>                                                | <u>Primary outcome:</u>                                                                                                                                     | <u>Primary outcome:</u>                                                   |
|                                | 7-day clinical response                                         | Time to in-hospital death                                              | <i>In vitro</i> effects of TMP-SMXcombined with other antimicrobial agents against <i>S. maltophilia</i> strains and clinical efficacy and 30-day mortality | clinical outcome and survival rate.                                       |
|                                | <u>Secondary outcomes:</u>                                      | <u>Secondary outcomes:</u>                                             | <u>Secondary outcomes</u>                                                                                                                                   | <u>Secondary outcomes</u>                                                 |
|                                | Microbiological cure                                            | Microbiologic effectiveness                                            | -N/A                                                                                                                                                        | -N/A                                                                      |
|                                | 30-day recurrence of infection                                  | Antimicrobial therapeutic modilities                                   |                                                                                                                                                             |                                                                           |
|                                | Hospital length of stay                                         |                                                                        |                                                                                                                                                             |                                                                           |
|                                | Infection-related length of stay                                |                                                                        |                                                                                                                                                             |                                                                           |
|                                | ICU length of stay                                              |                                                                        |                                                                                                                                                             |                                                                           |
|                                | 30-day infection-related mortality                              |                                                                        |                                                                                                                                                             |                                                                           |
|                                |                                                                 |                                                                        |                                                                                                                                                             |                                                                           |



| characteristic              | Included cohort studies       |                                   |                            |                                |
|-----------------------------|-------------------------------|-----------------------------------|----------------------------|--------------------------------|
|                             | Shah et al (2019)             | Guerci et al (2019)               | Araoka et al (2017)        | Muder et al (1996)             |
| 30-day all-cause mortality  |                               |                                   |                            |                                |
|                             |                               |                                   |                            |                                |
| Resistance development      |                               |                                   |                            |                                |
|                             |                               |                                   |                            |                                |
| Treatment details           | <u>Monotherapy</u>            | <u>Monotherapy</u>                | <u>Monotherapy</u>         | <u>Monotherapy</u>             |
|                             | TMP-SMX                       | TMP-SMX                           | TMP-SMX                    | TMP-SMX                        |
|                             | Levofloxacin                  | Levofloxacin                      | <u>Combination therapy</u> | Third-generation cephalosporin |
|                             | Ciprofloxacin                 | Ciprofloxacin                     | TMP-SMX + fluoroquinolone  | Extended-spectrum penicillin   |
|                             | Moxifloxacin                  | Ticarcillin/clavulanate           |                            | <u>Combination therapy</u>     |
|                             | Minocycline                   | Ceftazidime                       |                            | Receiving more than 1 of       |
|                             | Ceftazidime                   | Minocycline                       |                            | monotherapy agents             |
|                             | <u>Combination therapy</u>    | Colistin                          |                            |                                |
|                             | TMP-SMX + Levofloxacin        | Rifampicin                        |                            |                                |
|                             | TMP-SMX + Ciprofloxacin       | Tigecycline                       |                            |                                |
|                             | TMP-SMX + Moxifloxacin        | <u>Combination therapy</u>        |                            |                                |
|                             | TMP-SMX + Minocycline         | N/A                               |                            |                                |
|                             | TMP-SMX + Ceftazidime         |                                   |                            |                                |
|                             | Levofloxacin + Minocycline    |                                   |                            |                                |
|                             | Levofloxacin + Ceftazidime    |                                   |                            |                                |
|                             | Ciprofloxacin + Minocycline   |                                   |                            |                                |
|                             | Ciprofloxacin + Ceftazidime   |                                   |                            |                                |
|                             | Minocycline + Ceftazidime     |                                   |                            |                                |
| Comorbidity of participants | Cancer receiving chemotherapy | COPD                              | Hematological malignancies | Malignancy                     |
|                             | HSCT                          | Chronic respiratory insufficiency | Solid tumors               | Cardiac disease                |

| characteristic                   | Included cohort studies                          |                              |                     |                           |
|----------------------------------|--------------------------------------------------|------------------------------|---------------------|---------------------------|
|                                  | Shah et al (2019)                                | Guerci et al (2019)          | Araoka et al (2017) | Muder et al (1996)        |
|                                  | Solid organ transplant                           | Cystic fibrosis              |                     | Chronic pulmonary disease |
|                                  | HIV infection                                    | Hypertension                 |                     | Receipt of a transplant   |
|                                  |                                                  | Congestive heart failure     |                     | Chronic liver disease     |
|                                  |                                                  | Receiving dialysis           |                     | Receiving dialysis        |
|                                  |                                                  | Liver cirrhosis              |                     | HIV infection             |
|                                  |                                                  | Insulin requiring diabetes   |                     |                           |
|                                  |                                                  | Severe neurologic disability |                     |                           |
| Effect size (95% CI)             | (A) = 1.85 (0.75-4.98)<br>(B) = 1.97 (0.96-4.55) | 1.27 (0.88-1.83)             | 1.5 (0.43-5.22)     | 0.35 (0.08-3.18)          |
| Immunocompromised population (%) | 19.8                                             | 37.4                         | 100                 | 97.8                      |
| Polymicrobial (%)                | 54.4                                             | 58.4                         | 0                   | 40                        |
| Age of exposure group (year)     | 62a                                              | 65 (±9) <sup>b</sup>         | 60.5 <sup>a</sup>   | N/A                       |
| Male (%)                         | 62.3                                             | 69.9                         | 85.71               | N/A                       |
| Severity score                   | APACHE II score                                  | SOFA score                   | Pitt score          | Severity score            |

a = mean age (year), b = mean (SD), N/A; not applicable; (A)= 30-day infection related mortality; (B)= 30-day all cause mortality, COPD; Chronic obstructive Pulmonary disease, HIV; Human immunodeficiency virus, HSCT; hematopoietic stem cell transplantation, TMP-SMX; sulfamethoxazole-trimethoprim.
